# Supplementary material
Source: HighWire-hosted journal article supplement (https://www.cmaj.ca/highwire/filestream/57994/field_highwire_adjunct_files/1/are-van-online_appendix_2.pdf)
Supplement: are-van-online_appendix_2.pdf [file are-van-online_appendix_2.pdf]

**Appendix 2: Characteristics of the 37 individual studies included in the systematic review (page 1 of 4)**

| Reference                           | Study period | n*         | Study subjects                                      | Criteria for stillbirth |           | Confounders adjusted for                                                                                          | Effect modifiers considered          | Stillbirth rate† for reference age | Unadjusted RR or OR (95% CI), as calculated from data in original studies | Adjusted RR or OR (95% CI), as reported by original authors                                                            |
|-------------------------------------|--------------|------------|-----------------------------------------------------|-------------------------|-----------|-------------------------------------------------------------------------------------------------------------------|--------------------------------------|------------------------------------|---------------------------------------------------------------------------|------------------------------------------------------------------------------------------------------------------------|
|                                     |              |            |                                                     | GA, wk                  | Weight, g |                                                                                                                   |                                      |                                    |                                                                           |                                                                                                                        |
| <b>Retrospective cohort studies</b> |              |            |                                                     |                         |           |                                                                                                                   |                                      |                                    |                                                                           |                                                                                                                        |
| Astolfi et al <sup>14</sup>         | 1990-1994    | 2 305 879  | Singletons; primiparas and secundiparas             | ≥ 26                    | ≥ 500     | Stratified by parity and education                                                                                | None                                 | 4.05                               | 1.44 (1.35-1.53) for ≥ 35 v. < 35 yr                                      | —                                                                                                                      |
| Astolfi et al <sup>15</sup>         | 1990-1996    | 3 616 622  | Singletons; women ≥ 20 yr                           | ≥ 26                    | All       | Paternal age, parity, family education                                                                            | Age × parity, age × education        | 4.11                               | 1.57 (1.51-1.64) for ≥ 35 v. 20-29 yr                                     | 1.59 (1.51-1.68) for ≥ 35 v. 20-29 yr                                                                                  |
| Bianco et al <sup>16</sup>          | 1988-1994    | 8 382      | Singletons; women 20-29 or ≥ 40 yr                  | All                     | ≥ 500     | Medical illness, race, tobacco use                                                                                | None                                 | 4.16                               | 0.34 (0.08-1.43) for ≥ 40 v. 20-29 yr                                     | 0.5 (0.1-2.0) for ≥ 40 v. 20-29 yr                                                                                     |
| Canterino et al <sup>17</sup>       | 1995-2000    | 21 610 873 | Singletons; women 15-49 yr                          | ≥ 24                    | ≥ 500     | Gravidity, race, marital status, prenatal care, smoking, education, abruptio placentae, birth cohort              | None                                 | 2.77                               | 1.20 (1.16-1.23) for 35-49 v. 20-24 yr                                    | 1.23 (1.17-1.30) for 35-39 v. 20-24 yr, 1.62 (1.48-1.76) for 40-44 v. 20-24 yr, 2.40 (1.77-3.27) for 45-49 v. 20-24 yr |
| Cnattingius et al <sup>11</sup>     | 1983-1987    | 173 715    | Singletons; nulliparous women ≥ 20 yr               | ≥ 28                    | All       | Hypertension, diabetes, antepartum hemorrhage, infertility, education, cohabitation with infant's father, smoking | None                                 | 3.56                               | 1.46 (1.05-2.03) for ≥ 35 v. 20-24 yr                                     | 1.4 (1.0-2.0) for ≥ 35 v. 20-24 yr                                                                                     |
| Conde-Agudelo et al <sup>18</sup>   | 1985-1997    | 837 232    | Singletons                                          | ≥ 20                    | All       | Education, antenatal care, BMI, parity, small for GA, previous stillbirth, medical conditions                     | Mentioned, but factors not indicated | 16.22                              | 1.89 (1.82-1.98) for ≥ 35 v. 20-34 yr                                     | 1.53 (1.42-1.55) for ≥ 35 v. 20-34 yr                                                                                  |
| Donoso et al <sup>19</sup>          | 1999         | 182 322    | Singletons and multiples; women ≥ 20 yr             | All                     | All       | None                                                                                                              | None                                 | 4.23                               | 2.18 (1.69-2.82) for ≥ 40 v. 20-34 yr                                     | —                                                                                                                      |
| Feldman <sup>20</sup>               | 1987-1989    | 370 051    | Singletons and multiples                            | ≥ 26                    | All       | None                                                                                                              | None                                 | 6.22                               | 1.53 (1.38-1.69) for ≥ 35 yr v. < 35 yr                                   | —                                                                                                                      |
| Feresu et al <sup>21</sup>          | 1998         | 17 072     | Singletons and multiples (regression on singletons) | ≥ 20                    | ≥ 500     | Prenatal care, parity, fetal sex, type of delivery, residence                                                     | Age × GA                             | 56.76                              | 1.53 (1.25-1.86) for > 35 v. 20-35 yr                                     | 1.46 (1.12-1.89) for > 35 v. 20-35 yr                                                                                  |

*continued*

**Appendix 2: Characteristics of the 37 individual studies included in the systematic review (page 2 of 4)**

| Reference                      | Study period         | n*        | Study subjects                          | Criteria for stillbirth |           | Confounders adjusted for                                                                                                            | Effect modifiers considered                   | Stillbirth rate† for reference age | Unadjusted RR or OR (95% CI), as calculated from data in original studies | Adjusted RR or OR (95% CI), as reported by original authors                     |
|--------------------------------|----------------------|-----------|-----------------------------------------|-------------------------|-----------|-------------------------------------------------------------------------------------------------------------------------------------|-----------------------------------------------|------------------------------------|---------------------------------------------------------------------------|---------------------------------------------------------------------------------|
|                                |                      |           |                                         | GA, wk                  | Weight, g |                                                                                                                                     |                                               |                                    |                                                                           |                                                                                 |
| Fretts et al <sup>10</sup>     | 1961-1974, 1978-1993 | 94 346    | Singletons and multiples                | All                     | ≥ 500     | Medical conditions, placenta previa, abruptio placentae, year of delivery, plurality, marital status, prior abortion or fetal death | None                                          | 6.81                               | 1.57 (1.29-1.90) for ≥ 35 v. < 35 yr                                      | Did not report corresponding adjusted OR                                        |
| Fretts et al <sup>22</sup>     | 1961-1974, 1978-1995 | 101 640   | Singletons and multiples                | All                     | ≥ 500     | None                                                                                                                                | None                                          | 6.58                               | 1.53 (1.27-1.85) for ≥ 35 v. < 35 yr                                      | —                                                                               |
| Gadow et al <sup>23</sup>      | 1982-1986            | 869 750   | Singletons and multiples                | All                     | ≥ 500     | None                                                                                                                                | None                                          | 17.09                              | 1.92 (1.85-2.00) for ≥ 35 v. < 35 yr                                      | —                                                                               |
| Glinianaia et al <sup>24</sup> | 1982-2000            | 686 456   | Singletons and multiples                | ≥ 28                    | ≥ 500     | None                                                                                                                                | None                                          | 4.25                               | 1.61 (1.42-1.81) for ≥ 35 v. 25-29 yr                                     | —                                                                               |
| Haglund et al <sup>25</sup>    | 1985-1986            | 185 156   | Singletons; women 15-44 yr              | ≥ 28                    | All       | Socioeconomic status, parity, smoking                                                                                               | Age × parity, age × smoking, parity × smoking | 3.41                               | 1.30 (1.04-1.61) for 35-44 v. < 35 yr                                     | Did not report for maternal age                                                 |
| Heimann et al <sup>26</sup>    | 1975-1985            | 1 175     | Women 20-29 or ≥ 40 yr                  | All                     | All       | None                                                                                                                                | None                                          | 17.89                              | 0.70 (0.27-1.81) for ≥ 40 v. 20-29 yr                                     | —                                                                               |
| Jacobsson et al <sup>27</sup>  | 1987-2001            | 1 566 313 | Singletons and multiples                | ≥ 28                    | All       | Nulliparity, marital status, maternal diseases, smoking, plurality, malformations                                                   | None                                          | 3.18                               | 2.08 (1.81-2.38) for ≥ 40 v. 20-34 yr                                     | 2.07 (1.79-2.40) for 40-44 v. 20-34 yr, 3.76 (2.22-6.40) for ≥ 45 v. 20-34 yr   |
| Jolly et al <sup>7</sup>       | 1988-1997            | 385 120   | Singletons; women ≥ 18 yr               | All                     | All       | Parity, race, BMI, hypertension, pre-eclampsia, diabetes, smoking                                                                   | None                                          | 4.70                               | 1.37 (1.21-1.54) for 35-40 v. 18-34 yr                                    | 1.41 (1.17-1.70) for 35-40 v. 18-34 yr<br>1.83 (1.29-2.61) for > 40 v. 18-34 yr |
| Khandait et al <sup>28</sup>   | 1993-1997            | 46 443    | Singletons and multiples                | ≥ 28                    | ≥ 1000    | None                                                                                                                                | None                                          | 21.95                              | 2.81 (2.36-3.34) for ≥ 30 v. 20-29 yr                                     | —                                                                               |
| Kristensen et al <sup>29</sup> | 1989-1996            | 24 505    | Singletons and multiples; women ≥ 15 yr | ≥ 28                    | All       | BMI, height, parity, smoking, education, working status, alcohol and caffeine intake, fetal sex, marital status                     | Parity × prepregnancy BMI                     | 4.31                               | 1.47 (0.91-2.38) for ≥ 35 v. < 35 yr                                      | Did not report for maternal age                                                 |
| Lammer et al <sup>30</sup>     | 1982                 | 76 323    | Singletons and multiples                | All                     | All       | None                                                                                                                                | None                                          | 6.90                               | 1.69 (1.29-2.22) for ≥ 35 v. 20-34 yr                                     | —                                                                               |

*continued*

**Appendix 2: Characteristics of the 37 individual studies included in the systematic review (page 3 of 4)**

| Reference                         | Study period | n*        | Study subjects                                   | Criteria for stillbirth |           | Confounders adjusted for                                                                                    | Effect modifiers considered | Stillbirth rate† for reference age | Unadjusted RR or OR (95% CI), as calculated from data in original studies | Adjusted RR or OR (95% CI), as reported by original authors                                               |
|-----------------------------------|--------------|-----------|--------------------------------------------------|-------------------------|-----------|-------------------------------------------------------------------------------------------------------------|-----------------------------|------------------------------------|---------------------------------------------------------------------------|-----------------------------------------------------------------------------------------------------------|
|                                   |              |           |                                                  | GA, wk                  | Weight, g |                                                                                                             |                             |                                    |                                                                           |                                                                                                           |
| Naeye <sup>31</sup>               | 1959-1966    | 44 386    | Singletons; women ≥ 17 yr                        | All                     | All       | None                                                                                                        | None                        | 14.74                              | 2.23 (1.83-2.72) for ≥ 35 v. < 35 yr                                      | —                                                                                                         |
| Nybo Anderson et al <sup>32</sup> | 1978-1992    | 813 261   | Singletons and multiples                         | ≥ 28                    | All       | None                                                                                                        | None                        | 4.24                               | 1.26 (1.11-1.43) for ≥ 35 v. < 35 yr                                      | —                                                                                                         |
| Pugliese et al <sup>33</sup>      | 1983-1993    | 6 997     | Singletons and multiples; women 20-29 or ≥ 40 yr | All                     | All       | None                                                                                                        | None                        | 8.97                               | 0.35 (0.05-2.55) for ≥ 40 v. 20-29 yr                                     | —                                                                                                         |
| Rasmussen et al <sup>34</sup>     | 1967-1998    | 1 676 160 | Singletons                                       | ≥ 28                    | All‡      | Birth order                                                                                                 | None                        | 1.55                               | 1.80 (1.48-2.19) for ≥ 35 v. < 20 yr                                      | 1.7 (1.4-2.1) for 35-39 v. < 20 yr, 2.0 (1.5-2.6) for 40-44 v. < 20 yr, 3.9 (2.2-7.0) for ≥ 45 v. < 20 yr |
| Raymond et al <sup>35</sup>       | 1983-1989    | 638 242   | Singletons; women ≥ 20 yr                        | ≥ 28 w                  | All       | Parity, smoking                                                                                             | Age × GA                    | 3.22                               | 1.45 (1.29-1.62) for ≥ 35 v. 20-34 yr                                     | 1.5 (1.4-1.7) for ≥ 35 v. 20-34 yr                                                                        |
| Roman et al <sup>36</sup>         | 2001-2003    | 8 186     | Singletons; women 20-34 or ≥ 40 yr               | ≥ 22                    | All       | None                                                                                                        | None                        | 7.19                               | 3.64 (1.87-7.08) for ≥ 40 v. 20-34 yr                                     | —                                                                                                         |
| Seoud et al <sup>37</sup>         | 1992-1996    | 645       | Singletons; women 20-30 or ≥ 40 yr               | ≥ 20                    | All       | None                                                                                                        | None                        | 12.27                              | 4.53 (1.45-18.68) for ≥ 40 v. 20-30 yr                                    | —                                                                                                         |
| Sheiner et al <sup>38</sup>       | 1990-1997    | 78 453    | Singletons                                       | All                     | ≥ 500 g§  | Birth weight, race, abruptio placentae, cord problem, congenital anomalies, polyhydramnios, malpresentation | None                        | 0.67                               | 1.48 (0.74-2.96) for > 35 v. 20-35 yr                                     | 2.1 (1.1-3.8) for > 35 v. 20-35 yr                                                                        |
| Tough et al <sup>39</sup>         | 1990-1996    | 283 956   | Singletons and multiples                         | All                     | All       | None                                                                                                        | None                        | 6.45                               | 1.44 (1.26-1.63) for ≥ 35 v. < 35 yr                                      | —                                                                                                         |
| Viegas et al <sup>40</sup>        | 1986-1991    | 21 442    | Singletons and multiples                         | ≥ 28                    | All       | Race, parity                                                                                                | None                        | 5.31                               | 0.78 (0.41-1.50) for ≥ 35 v. < 35 yr                                      | Did not report for maternal age                                                                           |
| Ziadeh <sup>41</sup>              | 1996-2000    | 291       | Singletons; women 20-29 or ≥ 35 yr               | All                     | All       | None                                                                                                        | None                        | 6.76                               | 3.15 (0.25-166.47) for > 35 v. 20-29 yr                                   | —                                                                                                         |

*continued*

**Appendix 2: Characteristics of the 37 individual studies included in the systematic review (page 4 of 4)**

| Reference                       | Study period | n*                               | Study subjects           | Criteria for stillbirth |           | Confounders adjusted for                                                                                                                       | Effect modifiers considered | Stillbirth rate† for reference age | Unadjusted RR or OR (95% CI), as calculated from data in original studies | Adjusted RR or OR (95% CI), as reported by original authors                 |
|---------------------------------|--------------|----------------------------------|--------------------------|-------------------------|-----------|------------------------------------------------------------------------------------------------------------------------------------------------|-----------------------------|------------------------------------|---------------------------------------------------------------------------|-----------------------------------------------------------------------------|
|                                 |              |                                  |                          | GA, wk                  | Weight, g |                                                                                                                                                |                             |                                    |                                                                           |                                                                             |
| <b>Case-control studies</b>     |              |                                  |                          |                         |           |                                                                                                                                                |                             |                                    |                                                                           |                                                                             |
| Ferraz et al <sup>42</sup>      | 1984-1986    | Cases: 234<br>Controls: 2 555    | Singletons               | All                     | ≥ 500     | Medical conditions, prenatal care, previous pregnancy loss, congenital anomalies, maternal weight, vaginal bleeding, intrapartum complications | Age × smoking               | NA                                 | 2.00 (1.30-3.06) for ≥ 35 v. < 35 yr                                      | Did not report                                                              |
| Little et al <sup>43</sup>      | 1980         | Cases: 1 104<br>Controls: 2 565  | Singletons; nulliparous  | ≥ 28                    | ≥ 500     | Education, race, BMI, drinking, smoking, maternal height and weight, region of birth, fetal sex, nulliparity                                   | None¶                       | NA                                 | 1.61 (1.19-2.18) for ≥ 35 v. < 35 yr                                      | 1.67 (1.27-2.20) for ≥ 35 v. < 35 yr                                        |
| Meda et al <sup>44</sup>        | 1988-1989    | Cases: 96<br>Controls: 402       | Singletons               | ≥ 28                    | ≥ 1000    | Parity, education                                                                                                                              | None                        | NA                                 | 3.26 (1.68-6.31) for ≥ 35 v. < 35 yr                                      | Did not report for maternal age                                             |
| Petridou et al <sup>45</sup>    | 1989-1991    | Cases: 2 006<br>Controls: 30 705 | Singletons and multiples | ≥ 28                    | All       | Fetal sex, plurality, GA, birth weight, education, parity, religion, maternal residence                                                        | None                        | NA                                 | 1.80 (1.54-2.11) for > 35 v. < 35 yr                                      | 1.32 (1.0-1.65) for 35-39 v. 20-24 yr, 2.15 (1.5-3.06) for ≥ 40 v. 20-24 yr |
| Smeeton et al <sup>46</sup>     | 1996-1998    | Cases: 342<br>Controls: 1 368    | Singletons and multiples | ≥ 24                    | All       | GA, birth weight, emergency cesarean section                                                                                                   | None                        | NA                                 | 1.55 (1.20-1.99) for ≥ 30 v. < 30 yr                                      | 1.07 (1.02-1.12) (per year increase)                                        |
| Stephansson et al <sup>47</sup> | 1987-1996    | Cases: 702<br>Controls: 702      | Singletons; primiparous  | ≥ 28                    | All       | Socioeconomic status, BMI, maternal height, mother's country of birth                                                                          | None                        | NA                                 | 1.90 (1.23-2.94) for ≥ 35 v. 20-24 yr                                     | Did not report                                                              |

Note: GA = gestational age, RR = risk ratio, OR = odds ratio, CI = confidence interval, BMI = body mass index, NA = not applicable.

\*The n values presented here represent the total number of women in each study; for each study, this value may be greater than the sum of the numbers of older and younger women shown in Figure 2 of main article because it may include participants who, for various reasons, were not included in the determination of the RR or OR for the forest plot.

†Per 1000 total births.

‡Unexplained stillbirths.

§Died before onset of labour.

¶Not mentioned in Methods section of article, but Results section stated "No notable interactions among variables were detected."
